# Supplementary material for: Protocol for a feasibility study of a cohort embedded randomised controlled trial comparing NEphron Sparing Treatment (NEST) for small renal masses
Source: PubMed Central journal article supplement (PMC6577353; doi:10.1136/bmjopen-2019-030965), 2019-06-11
Supplement: bmjopen-2019-030965.reviewer_comments.pdf [file bmjopen-2019-030965.reviewer_comments.pdf]

## PEER REVIEW HISTORY

BMJ Open publishes all reviews undertaken for accepted manuscripts. Reviewers are asked to complete a checklist review form (<http://bmjopen.bmj.com/site/about/resources/checklist.pdf>) and are provided with free text boxes to elaborate on their assessment. These free text comments are reproduced below.

## ARTICLE DETAILS

|                            |                                                                                                                                                                                                                                                                           |
|----------------------------|---------------------------------------------------------------------------------------------------------------------------------------------------------------------------------------------------------------------------------------------------------------------------|
| <b>TITLE (PROVISIONAL)</b> | Protocol for a feasibility study of a cohort embedded randomised controlled trial comparing NEphron Sparing Treatment (NEST) for small renal masses                                                                                                                       |
| <b>AUTHORS</b>             | Neves, Joana; Cullen, David; Grant, Lee; Walkden, Miles; Bandula, Steve; Patki, Prasad; Barod, Ravi; Mumtaz, Faiz; Aitchison, Michael; Pizzo, Elena; Ranieri, Veronica; Williams, Norman; Wildgoose, William; Gurusamy, Kurinchi; Emberton, Mark; Bex, Axel; Tran, Maxine |

This article was not externally reviewed at BMJ Open. Protocols that have been independently assessed prior to submission to BMJ Open are usually fast-tracked to publication on the grounds that further substantial changes will not be possible. This independent assessment will usually be external, independent review for both a substantial grant award from a non-commercial or government funder and ethics approval .
